# Supplementary material for: Role of the North Atlantic circulation in the mid-Pleistocene transition
Source: Copernicus journal article supplement (doi:10.5194/cp-2018-30), 2018-03-21
Supplement: Supplementary file [file cp-2018-30-AC1-supplement.pdf]

# 1 **Role of the North Atlantic circulation in the mid-Pleistocene** 2 **transition**

3  
4 **Gloria M. Martin-Garcia<sup>1</sup>, Francisco J. Sierra<sup>1</sup>, José A. Flores<sup>1</sup>, Fátima**  
5 **Abrantes<sup>2</sup>**

6 <sup>1</sup> Department of Geology, University of Salamanca, Salamanca, Spain

7 <sup>2</sup> Marine Geology and Georesources (DivGM), Portuguese Institute for the Sea and  
8 Atmosphere, Lisbon, and Centre for Marine Sciences at University of Algarve,  
9 Portugal

10  
11 Correspondence to: G. M. Martin-Garcia (gm.martin@usal.es)

## 12 13 **Abstract**

14 The southwestern Iberian margin is highly sensitive to changes in the distribution  
15 of North Atlantic currents, and to the position of oceanic fronts. In this work, the  
16 evolution of oceanographic parameters from 812 to 530 ka (MIS20-MIS14) is studied  
17 based on the analysis of planktonic foraminifer assemblages from site IODP-U1385  
18 (37°34.285'N, 10°7.562'W; 2585 mbsl). By comparing the obtained results with  
19 published records from other North Atlantic sites between 41 and 55 °N, basin-wide  
20 paleoceanographic conditions are reconstructed. Variations of assemblages dwelling  
21 in different water masses indicate a major change in the general North Atlantic  
22 circulation during MIS16, coinciding with the definite establishment of the 100-ky  
23 cyclicity associated to the Mid-Pleistocene Transition. At surface, this change  
24 consisted in the re-distribution of water masses, with the subsequent thermal  
25 variation, and occurred linked to the northwestward migration of the Arctic Front (AF),  
26 and the increase in the North Atlantic Deep Water (NADW) formation respect to  
27 previous glacials. During glacials prior to MIS16, the NADW formation was very weak,  
28 which drastically slowed down the surface circulation; the AF was at a southerly  
29 position and the North Atlantic Current (NAC) diverted southeastwards, developing  
30 steep south-north, and east-west, thermal gradients and blocking the arrival of warm  
31 water, with associated moisture, to high latitudes. During MIS16, the increase in the

32 meridional overturning circulation, in combination with the north-westward AF shift,  
33 allowed the arrival of the NAC to subpolar latitudes, multiplying the moisture  
34 availability for ice-sheets growth, which could have worked as a positive feedback to  
35 prolong the glacials towards 100-ky cycles.

36

37 **Keywords:** Mid-Pleistocene Transition (MPT); North Atlantic circulation; North  
38 Atlantic Current (NAC); Planktonic foraminifers; Iberian margin; IODP-U1385;  
39 Glacials.

40

## 41 **1 Introduction**

42 Climate in the North Atlantic region is characterized by the continuous poleward  
43 heat flow carried out by the oceanic circulation. The Gulf Stream and the North  
44 Atlantic Current (NAC) transport warm and salty surface water, originated in the  
45 tropical region, towards the polar ocean, the northeast Atlantic, and along the western  
46 European margin, transferring heat and moisture to the atmosphere during the  
47 process. Surface circulation and associated heat flow is pumped by the sinking of  
48 surface water in the subpolar region and formation of the North Atlantic Deep-water  
49 (NADW). As a matter of fact, the Atlantic Meridional Overturning Circulation (AMOC)  
50 is responsible for ~50% of the total poleward heat advection (Sabine et al., 2004;  
51 Adkins, 2013).

52 The NAC forms the transition zone between the cold and productive waters  
53 located north of the Arctic Front (AF) (eg., Johannessen et al., 1994), and the warm  
54 and oligotrophic waters from the subtropical gyre in the South. Each water mass has  
55 distinct physic-chemical characteristics and specific planktonic foraminiferal  
56 assemblages (eg., Bé, 1977; Ottens, 1991; Cayre et al., 1999). Various studies have  
57 shown that surface water characteristics in the mid-latitude North Atlantic depend on  
58 the strength and position of the NAC and associated oceanic fronts (Calvo et al.,  
59 2001; Naafs et al., 2010; Voelker et al., 2010). During Pleistocene glacials, the AF  
60 migrated southward into mid-latitude North Atlantic (Stein et al., 2009; Villanueva et  
61 al., 2001), cold polar waters expanded to lower latitudes and the NAC did not reach  
62 as far North as during interglacials (e.g., Pflaumann et al., 2003).

63 After MIS21, a northwestward shift in the position of the AF began (Hernandez-  
64 Almeida et al., 2013), that culminated at the end of MIS16, in a similar location to  
65 today's (Wright and Flower, 2002). Coinciding with the final stage of this shift, a major  
66 reorganisation of the meridional overturning circulation developed, related to  
67 increased NADW formation that resulted in deeper and southward penetration of this  
68 mass of water (Poirier and Billups, 2014). Both processes could have been related  
69 with the prolongation of glacials that occurred at the end of the mid-Pleistocene  
70 transition (MPT). This was the transitional period during which, the Earth's climate  
71 system underwent a major change, switching from a linear orbital (41 and 23 ky  
72 cycles) response, to a non-linear 100 ky forcing. Although there is still no agreement  
73 over the initiation of the MPT (e.g., Clark et al., 2006; Maslin and Brierley, 2015),  
74 strong 100 ky cycles are recorded since ~650 ka (Ruddiman et al., 1989; Imbrie et  
75 al., 1993; Mudelsee and Schulz, 1997). Related with the shift in the AF position, warm  
76 and salty surface water could reach subpolar latitudes during glacials, which would  
77 have provided the necessary humidity to prolong the growth of ice sheets, as well as  
78 enhanced meridional overturning – both processes acting as feedback mechanisms  
79 partly responsible for the change of the climate system phasing (Imbrie et al., 1993).  
80 The objective of this work is to study the evolution of glacial circulation in the North  
81 Atlantic from MIS20 to MIS14, and explore its possible relation with the MPT.

82 Over the last glacial cycle, the Iberian margin recorded both peak displacement  
83 events of the AF and periods of greater influence of subtropical water from the Azores  
84 Current (AzC) (eg., Martrat et al., 2007; Eynaud et al., 2009; Salgueiro et al., 2010).  
85 There is also evidence that polar to tropical planktonic foraminifers assemblages co-  
86 occurred in a latitudinal band around 35° – 40°N during the Last Glacial Maximum  
87 (McIntyre et al., 1972), which suggests that the limit between both water masses was  
88 situated slightly southwards than it is today (Fiúza et al., 1998; Peliz et al., 2005). Site  
89 IODP-U1385 (37°34'N) lies within this oscillating boundary, and has been proven an  
90 ideal location to study oceanographic changes in the North Atlantic through glacial-  
91 interglacial periods (e.g., Maiorano et al., 2015; Martin-Garcia et al., 2015; Rodríguez-  
92 Tovar et al., 2015; Rodrigues et al., 2017). Analyses of planktonic foraminifer  
93 assemblages are used to identify the different water masses, and results from IODP-

94 U1385 are compared with published data from other North Atlantic latitudes to reach  
95 basin-wide conclusions.

96

## 97 **2 Materials and Methods**

### 98 **2.1 IODP Site U1385**

99 The Southwestern Iberian margin is a focal location for paleoclimate and  
100 oceanographic research on the Quaternary (Hodell et al. 2013). Site IODP-U1385  
101 was drilled at the so-called Shackleton Site (37°34.284'N, 10°7.562'W), at 2589  
102 meters water depth (Fig. 1). At surface, this area lies under the influence of the *North*  
103 *Atlantic Central Water* (NACW), with a complex circulation pattern; at depth, the  
104 NADW flows between ~2,200 and 4,000 meters, above the *Antarctic Bottom Water*  
105 (AABW).

106 Today's surface water circulation in the North Atlantic (Fig. 1a) consists of two  
107 different branches. The NAC, after reaching the subpolar ocean, drifts southwards  
108 along Europe transporting the Eastern North Atlantic Central Water of sub-polar origin  
109 (ENACWsp), formed north of 46° (Brambilla and Talley, 2008). In the south, the AzC,  
110 of subtropical origin (ENACWst) and formed along the Azores Front (Rios et al.,  
111 1992), drifts eastwards and bifurcates when approaching the continental margin. The  
112 ENACWst is saltier, warmer, less dense than the ENACWsp and overflows it along  
113 Iberia with a decreasing lower limit from south to north until ~42.7 °N (Fiúza et al.,  
114 1998).

115 Sediments at Site U1385 define a single lithological unit with a high  
116 sedimentation rate (~10 cmky<sup>-1</sup>), very uniform and dominated by calcareous muds  
117 and calcareous clays, with varying proportions of biogenic carbonate (23% - 39%)  
118 and terrigenous sediments (Stow et al., 2012).

119

### 120 **2.2 Foraminiferal study**

121 This study covers a section comprised between 67.2 and 94.6 crmcd (MIS14 -  
122 MIS20). The age model (Hodell et al., 2015) is based on the correlation of the benthic  
123 oxygen isotope record to the global benthic LR04 isotope stack (Lisiecki and Raymo,  
124 2005).

125 Sampling was performed every 20 cm, providing a 1.76-ky resolution on average.  
126 A total of 147 samples, 1 cm-thick, were freeze-dried, weighed and washed over a  
127 63- $\mu\text{m}$  mesh. The >63  $\mu\text{m}$  residue was dried, weighed and sieved again to separate  
128 and weigh the >150  $\mu\text{m}$  fraction. Planktonic foraminifers' taxa were identified (Kennett  
129 and Srinivasan, 1983) in aliquots of this last fraction containing a minimum of 300  
130 specimens.

131 The microfaunal analysis focused on species and assemblages (Appendices A  
132 and B) that are associated with North Atlantic surface water masses.

133

### 134 **2.3. Estimation of thermal gradients**

135 Thermal gradients in the North Atlantic are reconstructed by calculating the  
136 difference between the Sea Surface Temperature (SST) from two sites. The site 607  
137 was used as start point, and compared with sites 980 for the latitudinal gradient  
138 ( $\text{SST}_{607} - \text{SST}_{980}$ ), and U1385 for the longitudinal one ( $\text{SST}_{607} - \text{SST}_{\text{U1385}}$ ). In this  
139 way, a positive longitudinal gradient means that SST was warmer at site 607 than at  
140 U1385; a negative longitudinal gradient indicates warmer SST off SW Iberia than at  
141 site 607.

142 SST records from all sites have been previously published (Ruddiman et al.,  
143 1989; Wright and Flower, 2002; Martin-Garcia et al., 2015) and are based in  
144 planktonic foraminifers' census counts.

145

## 146 **3 Results**

147 *Neogloboquadrina pachyderma* sinistral (Nps) is an indicator of polar water  
148 (Cayre et al., 1999; Pflaumann et al., 2003; Eynaud et al., 2009). Except in the eighth  
149 climate cycle (MIS19-MIS18), Nps does not vary at glacial-interglacial scale, but peak  
150 percentages are associated either to glacial maxima (MIS20) or to deglaciations, both  
151 Terminations and other deglacial events (Fig. 2b), revealing increased advection of  
152 polar water at these times. Nps is less abundant during interglacial conditions than  
153 during glacials, but it is important to note that glacial Nps' percentages change  
154 through the time series. Nps is more abundant during glacials MIS20, MIS18 (when  
155 the highest percentages occurred), and the first half of MIS16, than during late MIS16

156 and glacial MIS14 (Fig. 2b). After ~650 ka, Nps keeps below 10%, except during  
157 some deglacial events, as inferred from sharp decreases in  $\delta^{18}\text{O}$  (Fig.2a-b). This  
158 suggests that since mid-MIS16, the polar water only reached the southwest Iberian  
159 margin associated to some deglacial episodes, and not during full glacial conditions  
160 or glacial maxima, in opposition to what happened before ~650 ka.

161 *Turborotalita quinqueloba* (Tq) dwells in cold waters and is usually associated  
162 with the AF (Johannessen et al., 1994; Cayre et al., 1999). Its percentage in U1385 is  
163 lower before MIS16 than since then (Fig. 2c). Highest values occur at ~650 ka and  
164 during MIS15b, the glacial interval that interrupted interglacial MIS15. The variation of  
165 Tq in site U1385 does not show an interglacial-glacial pattern, which suggests this  
166 site did not register the migration of the AF through each climate cycle.

167 The NAC assemblage (Ottens, 1992; Appendix A) is the most abundant one at  
168 this site (Fig. 2), indicating that the ENACWsp dominates the surface oceanography  
169 in the area through the time series. This assemblage does not keep a similar  
170 interglacial-glacial pattern through the whole study interval, but changes its behaviour  
171 at ~650 ka. Previous to ~650 ka, its variation mirrors that of Nps, and the highest  
172 values occur during interglacials. In opposition to this, since ~650 ka,, the highest  
173 percentages coincide with full glacial conditions (MIS16a and MIS14a), not with  
174 interglacials (Fig. 2d).

175 The Warm Surface (WS) assemblage (Vautravers et al., 2004; Appendix B) is  
176 typical of the subtropical water transported eastwards by the AzC. In U1385, this  
177 assemblage shows a clear interglacial-glacial pattern only since the seventh climate  
178 cycle (Fig. 2e). During glacials previous to MIS16, the WS assemblage is fairly  
179 abundant (MIS18), and even more abundant than during interglacials, like in MIS20,  
180 when it reaches the highest percentages of the whole study interval. During MIS16,  
181 its percentage decreases as the glacial advances, and in MIS14, values are low since  
182 the glacial inception. At the beginning of each interglacial, its percentage rises rapidly,  
183 suggesting that the AzC strengthens rapidly in the area after Terminations.

184

## 185 **5 Discussion**

186 The location of sites 607 and 980 along the main core of the NAC towards the  
187 high latitudes of the North Atlantic (Fig. 1a), allowed us to monitor past changes in the  
188 northward heat transport, using planktonic foraminifer assemblages and SST  
189 reconstructions from both sites. By contrast, planktonic foraminifer assemblages at  
190 site U1385 are more influenced by the advection of heat to the northeastern Atlantic  
191 through the easternmost branches of the NAC, and especially by the AzC, that  
192 originates in the tropics and flows towards Iberia following the northern margin of the  
193 subtropical gyre (Fig. 1a). In consequence, with these three strategic sites, we can  
194 monitor changes in the main circulation systems of the NE Atlantic during the mid-  
195 Pleistocene, and estimate the heat advection to the north (SST gradient between  
196 sites 607 and 980) and to the northeast Atlantic (SST gradient between sites 607 and  
197 U1385) (Fig. 3f-g).

198

### 199 **5.1 North Atlantic circulation during glacials MIS20 and MIS18**

200 During both glacials, progressive cooling is recorded in sites 607 and 980 (Fig. 3f).  
201 Though the cooling is more pronounced at the higher latitude, the SST gradient  
202 between both sites is not very high and decreases largely towards the end of glacial  
203 stages (Fig. 3g). In contrast, the Iberian margin remained relatively warm during most  
204 of MIS20 and a large part of MIS18 (Fig. 3f), which undoubtedly reflects a continuous  
205 flow of the AzC to this region, as also indicated by the WS assemblage record (Fig.  
206 2e).

207 At the subpolar latitude of site 980, the presence of polar water increased rapidly  
208 since glacial inceptions, as informed by very high percentages of Nps during MIS20,  
209 MIS18e, and MIS18a (Fig. 3c). As glacial conditions progressed, the heat flow along  
210 the main core of the NAC reduced largely, and even interrupted at glacial maxima  
211 MIS20a and MIS18a, as can be inferred from the low temperatures registered in the  
212 Azores region (site 607, Fig. 3f). This reduced advection of warm water from the  
213 tropics to subpolar latitudes triggered the southward migration of the AF, that  
214 surpassed 50 °N during both MIS20, MIS18e, and MIS18a (Wright and Flower, 2002),  
215 and favoured the advection of polar water as far south as site 607, as informed by the  
216 Nps record (Fig. 3c).

217 While the northward flow of heat decreased progressively along both glacials, the  
218 heat flow towards the Iberian margin continued in the early part of glacial MIS18 and,  
219 especially, during MIS20, indicating a very active AzC during both glacials. This  
220 current advected warm water eastward, and deflected northward along the Iberian  
221 margin, similarly to today's IPC (Fig. 1a), probably overflowing the polar water mass,  
222 as the co-occurrence of polar and subtropical fauna suggest (Fig. 2b,e). The  
223 advection of the warm AzC to site U1385 was only interrupted at Terminations TIX,  
224 TVIII, and at deglaciation MIS18e/d, when massive surges of very cold and low-  
225 salinity surface waters reached the area, which was registered by peaks of the polar  
226 species Nps and sharp decreases in the WS assemblage (Fig. 2b,e). This  
227 interpretation is corroborated by the negative longitudinal thermal gradient between  
228 sites 607 and U1385 (Fig. 3g), which indicates that, an important fraction of the heat  
229 reaching the Iberian margin did not flow through the site 607 region.

230 The very low SST at the mid-latitude site 607, and the low latitudinal thermal  
231 gradient, during glacial maxima MIS20a, MIS18e and MIS18a (Fig. 3f-g), suggests  
232 either a complete shut-down of the NAC core flux, or a southward or southeastward  
233 diversion of this current, as glacial conditions progressed. Nevertheless, the low  
234 thermal gradient between sites 607 and U1385 (Fig. 3g) implies that the SW Iberian  
235 margin was always under the influence of the warmer AzC.

236

## 237 **5.2 Changes in the North Atlantic circulation starting at MIS17**

238 Both latitudinal and longitudinal thermal gradients (Fig. 3g) inform of drastic  
239 rearrangement of North Atlantic circulation starting at MIS17. SST at site 607 was  
240 much warmer than during MIS19, although both interglacials were similar, according  
241 to  $\delta^{18}\text{O}$  (Fig. 3a,f). This points to a reactivation of the NAC during MIS17, and a  
242 displacement of this current westward site 607. Such reactivation would be the result  
243 of increased NADW formation, that reached higher rates than during the previous  
244 interglacial, as suggested by the  $\sim 0.2\text{‰}$  higher  $\delta^{13}\text{C}$  in MIS17 than in MIS19 (Fig. 3b).  
245 On the other hand, the very high latitudinal thermal gradient (Fig. 3g) suggests that



246 this current did not reach subpolar latitudes, as it did during the following interglacial,  
247 MIS15, when this gradient was much lower.

248 The unusually high longitudinal thermal gradient registered during MIS17 was due  
249 to the prolonged deglaciation of MIS18, that continuously advected polar water along  
250 the Iberian margin (Martin-Garcia et al., 2015), resulting in very cold SST and high  
251 Nps percentages, at site U1385 (Fig. 3).

252 MIS16 was a very prolonged glacial with extensive ice sheets; nevertheless, polar  
253 waters did not extend to the mid-latitude ocean, as suggested by the low percentages  
254 of Nps in sites 607 and U1385 (Fig. 3c).

255 The latitudinal thermal gradient for most of MIS16, and the whole MIS14, was  
256 notably higher than during MIS20-18 (Fig. 3g). This great SST decrease, between  
257 sites 607 and 980, must be the result of a significant heat loss to the atmosphere and  
258 associated release of water vapour, along the path of the NAC during both MIS16 and  
259 MIS14. This water vapour release provided the necessary moist to continue ice-  
260 sheets growth, opposite to what had happened during previous glacials. Also contrary  
261 to glacials MIS20 and MIS18, when the surface water at the subpolar site 980  
262 progressively cooled towards glacial maxima without important millennial-scale  
263 oscillations (Fig. 3f), in glacials MIS16 and MIS14, the surface ocean circulation was  
264 very variable and the AF migrated northward-southward site 980 very frequently (Fig.  
265 3c-d). During short time periods, the NAC reached this subpolar site, conveying heat  
266 to the northern-latitude Atlantic (Fig. 3e). However, this oscillation of the AF never  
267 affected middle latitudes, according to the fairly mild SST, and low percentage of Nps,  
268 recorded both in the open ocean and in the continental margin during MIS16-14 (Fig.  
269 3c,f).

270 In the mid-latitude ocean site 607, SST during MIS16 and MIS14 were very  
271 different from those recorded in MIS20 and MIS18 (Fig. 3f). While in the older glacials  
272 SST decreased towards glacial maxima, this trend is not observed during MIS16 and  
273 MIS14, and warm SST was recorded also during glacial maxima.

274 Although warmer SST were recorded through the mid-latitude North Atlantic, a  
275 negative thermal gradient still prevailed during MIS16-14, between sites 607 and  
276 U1385 (Fig. 3g), indicating a continuous heat flow toward southwest Iberia. This

277 suggests that, this region remained under the influence of the subtropical AzC during  
278 most part of glacials MIS16 and MIS14, as it also did during MIS20, based on the mild  
279 SST registered at that time (Fig. 3f). Contrary to previous glacials, the NAC kept  
280 vigorous in site U1385 during MIS16, except at ~655 ka, and MIS14, and increased  
281 its strength as glacials advanced (Fig. 2d).

282

### 283 **5.3 Implications of changes in the North Atlantic circulation associated to the** 284 **MPT**

285 Assuming a close correlation between the rate of AMOC and benthic  $\delta^{13}\text{C}$  levels  
286 (Zahn et al, 1997; Adkins et al., 2005; Hoogakker et al., 2006), data from the sub-  
287 polar North Atlantic (Wright and Flower, 2002; Hodell et al., 2008) document a long-  
288 term increase in the NADW formation rate, that initiated in MIS22 and culminated in  
289 MIS14. This enhanced the southward flux of the NADW and, since MIS17, mid-  
290 latitude North Atlantic sites registered a relative decrease of the AABW during  
291 glacials, and subtropical sites recorded the presence of NADW at depths previously  
292 occupied by the AABW (e.g., Poirier and Billups, 2014; Hodell et al., 2015).

293 The increased production of NADW, during glacials after MIS16 respect to  
294 previous ones, triggered the advection of relatively-warm NAC towards subpolar  
295 latitude, providing additional humidity to the area and, thus, enhancing the growth of  
296 ice sheets, which led to the prolonged and extreme glaciation of MIS16, one of the  
297 first and most prominent glacials of the “100-ky world”. In addition, the intermittent  
298 advection of this warm water made ice sheets more vulnerable to internal instabilities,  
299 with the subsequent release of icebergs registered in the North Atlantic during MIS16  
300 (e.g., Wright and Flower, 2002; Hodell et al., 2008). The interaction between a more  
301 intense AMOC and ice sheet instabilities, recorded by rapid migrations of the AF  
302 north and south of site 980 (Fig. 3c-d), resulted in punctual events of sharp reduction  
303 of the NADW formation, like that at ~655 ka that coincided with one of the  
304 southernmost positions of the AF, according to the Tq record in site 980 (Wright and  
305 Flower, 2002), and was also registered in U1385 by peaks in Nps and Tq, and very  
306 low percentage of NACass (Fig. 3b-e). Both this episode and the outstanding one

307 ~650 ka, with the lowest  $\delta^{13}\text{C}$  value since MIS18 in middle latitudes in coincidence  
308 with very high abundance of the NACass in high latitudes (Fig. 3b,e), points to an  
309 exceptionally vigorous but shallow NA overturning cell, underlain by significant  
310 volumes of southern-sourced water, similarly to the situation at the end of TII (Böhm  
311 et al., 2014). This mode of AMOC, according to benthic  $\delta^{13}\text{C}$  records, maintained  
312 during glacial stages MIS16, MIS15b, and MIS14, when the subpolar site 980  
313 recorded > 0.25 ‰ higher  $\delta^{13}\text{C}$  than southerner sites (Wright and Flower, 2002;  
314 Hodell et al., 2015, 2016).

315 This vigorous AMOC mode recorded in MIS14 was the culmination of a sequence  
316 of increasing deepening of the overturning circulation cell that initiated in MIS22, and  
317 was registered by a tendency towards higher benthic  $\delta^{13}\text{C}$ , both in high and mid-  
318 latitude sites U1308 and U1313, from MIS22 to MIS14 (Hodell and Channell, 2016),  
319 and was especially noticeable during glacial stages. During MIS20 and MIS18, ice  
320 sheets collapses (Wright and Flower, 2002) produced a continuous flux of meltwater  
321 pulses that kept very weak NADW formation; the deep North Atlantic being occupied  
322 by southern-sourced waters, according to very low benthic  $\delta^{13}\text{C}$  recorded both in  
323 middle and high latitudes (Wright and Flower, 2002; Hodell et al., 2015; 2016). During  
324 these glacials, the almost shutdown AMOC maintained the AF at a southern position  
325 and prevented the northward flux of the necessary moisture for the growth of ice  
326 sheets, which could not work as a positive feedback and extend glacial stages over  
327 obliquity and precessional (41- and 23 ky) cycles, as they worked during MIS16, one  
328 of the first and most prominent glacials of the “100-ky world”.

329

## 330 **6 Conclusions**

331 By studying planktonic foraminiferal assemblages from the Iberian margin (IODP-  
332 U1385) for the interval 812–530 ka and comparing them with records from other sites  
333 between 41 and 55 °N, we are able to trace paleoceanographic conditions across the  
334 North Atlantic from MIS20 to MIS14 and draw the following conclusions:

335 Variations of microfaunal assemblages associated to surface currents indicate a  
336 major change in the general North Atlantic circulation during this interval, coinciding

337 with the definite establishment of the 100-ky climate phasing. In surface, this change  
338 consisted in the re-distribution of water masses and associated SST that happened  
339 linked to the northwestward migration of the AF during MIS16, and was related with  
340 the increasing NADW formation trend that initiated in MIS22.

341 Prior to MIS 16, the AMOC rate was very low, especially during glacials, the AF  
342 was at a southerly position, and the NAC diverted southeastwards, developing steep  
343 south-north and east-west thermal gradients, and blockading the arrival of warm  
344 water, with associated moisture, to the high latitude North Atlantic.

345 During MIS16, the NADW formation increased respect to previous glacials,  
346 especially during glacial maxima, which resulted in the north-westward AF shift and  
347 enhanced surface circulation, allowing the arrival of the relatively-warm NAC to  
348 subpolar latitudes and increasing the moisture availability to continuing the ice sheets  
349 growth, which would have worked as a positive feedback to prolong the duration of  
350 glacials to 100-ky cycles.

351

#### 352 **Appendix A: North Atlantic current assemblage** (Ottens, 1991)

353 *Globigerina bulloides*

354 *Globigerinella siphonifera (aequilateralis)*

355 *Globorrotalia inflata*

356 *Neogloboquadrina pachyderma dextral*

357

#### 358 **Appendix B: warm surface assemblage** (Vautravers et al., 2004)

359 *Beela digitata*

360 *Globigerina falconensis*

361 *Globigerinella siphonifera (aequilateralis)*

362 *Globigerinoides ruber*

363 *Globigerinoides sacculifer*

364 *Globoturborotalita rubescens*

365 *Globoturborotalita tenella*

366 *Orbulina universa*

367 *Pulleniatina obliquiloculata*

368

369 **References**

- 370 Adkins, J. 2013: The role of deep ocean circulation in setting glacial climates.  
371 *Paleoceanography*, 28, 539-561
- 372 Adkins, J.F., Ingersoll, A.P., Pasquero, C., 2005: Rapid climate change and  
373 conditional instability of the glacial deep ocean from the thermobaric effect and  
374 geothermal heating. *Quat. Sci. Rev.*, 24, 581–594
- 375 Bé, A.W.H., 1977: Recent planktonic foraminifera. *Oceanic Micropaleontology*, 1,  
376 Ramsay, A.T.S., Ed., Elsevier, New York, pp. 1-100.
- 377 Böhm, E., Lippold, J., Gutjahr, M., Frank, M., Blaser, P., Antz, B., Fohlmeister, J.,  
378 Frank, N., Andersen, M.B., Deininger, M., 2014: Strong and deep Atlantic  
379 meridional overturning circulation during the last glacial cycle.  
380 doi:10.1038/nature14059
- 381 Brambilla, E., Talley, L.D., 2008: Subpolar Mode Water in the northeastern Atlantic: 1.  
382 Averaged properties and mean circulation. *J. Geophys. Res.* 113, C04025,  
383 doi:10.1029/2006JC004062
- 384 Calvo, E., Villanueva, J., Grimalt, J.O., Boelaert, A., Labeyrie, L., 2001: New insights  
385 into the glacial latitudinal temperature gradients in the North Atlantic. Results  
386 from  $U^{K}_{37}$  sea surface temperatures and terrigenous inputs. *Earth Planet. Sci.*  
387 *Lett.*, 188 (3-4), 509-519, doi:10.1016/S0012-821X(01)00316-8
- 388 Cayre, O., Lancelot, Y., Vincent, E., 1999: Paleoceanographic reconstructions from  
389 planktonic foraminifera on the Iberian Margin: Temperature, salinity and  
390 Heinrich events. *Paleoceanography*, 14 (3), 384-396
- 391 Clark, P.U., Archer, D., Pollard, D., Blum, J.D., Rial, J.A., Brovkin, V., Mix, A.C.,  
392 Piasias, N.G., Roy, M., 2006: The middle Pleistocene transition: characteristics,  
393 mechanisms, and implications for long-term changes in atmospheric pCO<sub>2</sub>.  
394 *Quat. Sci. Rev.* 25, 3150-3184
- 395 Expedition 339 Scientists, 2012: Mediterranean outflow: environmental significance of  
396 the Mediterranean Outflow Water and its global implications. *IODP Prel. Rept.*,  
397 339. doi:10.2204/iodp.pr.339.2012

398 Eynaud, F., de Abreu, L., Voelker, A., Schonfeld, J., Salguero, E., Turon, J.L.,  
399 Penaud, A., Toucanne, S., Naughton, F., Sanchez-Goñi, M.F., 2009: Position of  
400 the Polar Front along the western Iberian margin during key cold episodes of  
401 the last 45 ka. *Geoch. Geoph. Geosystems* 10, Q07U05,  
402 doi:10.1029/2009GC002398

403 Fiúza, A.F.G., Hamann, M., Ambar, I., Díaz del Río, G., González, N. Cabanas, J.M.,  
404 1998: Water masses and their circulation off western Iberia during May 1993.  
405 *Deep-Sea Research* 45, 1127-1160

406 Hernandez-Almeida, I., Bjoklund, K.R., Sierro, F.J., Filippelli, G.M., Cacho, I., Flores,  
407 J.A., 2013: A high resolution opal and radiolarian record from the subpolar  
408 North Atlantic during the Mid-Pleistocene Transition (1069-779 ka):  
409 Paleoceanographic implications. *Palaeogeogr. Palaeoclimatol. Palaeoecol.*,  
410 doi:10.1016/m.palaeo.2011.05.049

411 Hodell, D.A., Channell, J.E.T., 2016: Mode transitions in Northern Hemisphere  
412 glaciation: co-evolution of millennial and orbital variability in Quaternary climate.  
413 *Clim. Past* 12, 1805-1828, doi: 10.5194/cp-12-1805-2016

414 Hodell, D.A., Channell, J.E.T., Curtis, J.H., Romero, O.E., Röhl, U., 2008: Onset of  
415 "Hudson Strait" Heinrich events in the eastern North Atlantic at the end of the  
416 middle Pleistocene transition (~640 ka)? *Paleoceanography* 23,  
417 doi:10.1029/2008PA001591

418 Hodell, D., Crowhurst, S., Skinner, L., Tzedakis, P.C., Margari, V., Channell, J.E.T.,  
419 Kamenov, G., Maclachlan, S., Rothwell, G., 2013: Response of Iberian Margin  
420 sediments to orbital and suborbital forcing over the past 420 ka. *Paleocean.* 28  
421 (1), 185-199, doi: 10.1002/palo.20017

422 Hodell, D., Lourens, L., Crowhurst, S., Konijnendijk, T., Tjallingii, R. and the  
423 Shackleton Site Project Members, 2015: A reference time scale for Site U1385  
424 (Shackleton Site) on the Iberian Margin. *Global and planetary Change* 133, 49-  
425 64, doi:10.1016/j.gloplacha.2015.07.002

426 Hoogakker, B.A., Rohling, E.J., Palmer, M.R., Tyrrell, T., Rothwell, R.G., 2006:  
427 Underlying causes for long-term global ocean  $\delta^{13}\text{C}$  fluctuations over the last

428 1.20 Myr. Earth and Planet. Sci. Lett. 248 15-29,  
429 doi:10.1016/j.epsl.2006.05.007

430 Johannessen, T., Jansen, E., Flatoy, A., Ravelo, A.C., 1994: The relationship  
431 between surface water masses, oceanographic fronts and paleoclimatic proxies  
432 in surface sediments of the Greenland, Iceland, Norwegian seas. NATO ASI  
433 Series, 117, Zahn, R. et al. Eds., Springer-Verlag, New York, 61-85

434 Imbrie, J. et al., 1993: On the structure and origin of major glaciation cycles 2: The  
435 100,000 year cycle. *Paleoceanography* 8, 699-735, doi:10.1029/93PA02751

436 Kennett, J.P., Srinivasan, M.S., 1983: Neogene Planktonic Foraminifera. A  
437 Phylogenetic Atlas. Hutchinson Ross Publishing Company, New York

438 Lisiecki, L.E., Raymo, M.E., 2005: A Pliocene-Pleistocene stack of 57 globally  
439 distributed benthic  $\delta^{18}\text{O}$  records. *Paleoceanography*, 20, PA1003,  
440 doi:10.1029/2004PA001071

441 Maiorano, P., Marino, M., Balestra, B., Flores, J.A., Hodell, D.A., Rodrigues, T., 2015:  
442 Coccolithophore variability from the Shackleton Site (IODP Site U1385) through  
443 MIS 16-10. *Global and Planetary Change* 133, 35-48

444 Maslin, M.A., Brierley, C.M., 2015: The role of orbital forcing in the early middle  
445 pleistocene transition. *Quat. Int.* 389, 47-55

446 Martin-Garcia, G.M., Alonso-Garcia, M., Sierro, F.J., Hodell, D.A., Flores, J.A., 2015:  
447 Severe cooling episodes at the onset of deglaciations on the Southwestern  
448 Iberian margin from MIS 21 to 13 (IODP site U1385). *Global and Planetary*  
449 *Change* 135, 159-169, doi:10.1016/j.gloplacha.2015.11.001

450 Martrat, B., Grimalt, J.O., Shackleton, N.J., de Abreu, L., Hutterli, M.A., Stocker, T.F.,  
451 2007: Four Climate Cycles of Recurring Deep and Surface Water  
452 Destabilizations on the Iberian Margin. *Science*, 317 (5837), 502-507,  
453 doi:10.1126/science.1101706

454 McIntyre, A., Ruddiman, W.F., Jantzen, R., 1972: Southward penetrations of the  
455 North Atlantic Polar Front: faunal and floral evidence of large-scale surface  
456 water mass movements over the last 225,000 years. *Deep-Sea Res.* 19, 61-77.

457 McManus, J.F., Oppo, D.W., Cullen, J.L., 1999: A 0.5-million-year record of millennial.  
458 scale climate variability in the North Atlantic. *Science* 283 (5404), 971-975,  
459 doi:10.1126/science.283.5404.971

460 Mudelsee, M., Schulz, M., 1997: The Mid-Pleistocene climate transition: onset of 100  
461 ka cycle lags ice volume build-up by 280 ka. *Earth Planet. Sci. Lett.* 151, 117-  
462 123

463 Naafs, B.D.A., Stein, R., Hefter, J., Khélifi, N., De Schepper, S., Haug, G.H., 2010:  
464 Late Pliocene changes in the North Atlantic Current. *Earth and Planetary*  
465 *Science Letters* 298, 434-442

466 Ottens, J.J., 1991: Planktic foraminifera as North Atlantic watermass indicators.  
467 *Oceanol. Acta*, 14, 123-140

468 Pflaumann, U., Sarnthein, M., Chapman, M., de Abreu, L., Funnell, B., Huels, M.,  
469 Kiefer, T., Maslin, M., 2003: Glacial North Atlantic: sea-surface conditions  
470 reconstructed by GLAMAP 2000. *Paleoceanography* 18, 1065,  
471 doi:10.1029/2002PA000774

472 Peliz, A., Dubert, J., Santos, A.M.P., Oliveira, P.B., Le Cann, B., 2005: Winter upper  
473 ocean circulation in the Western Iberian Basin - Fronts, eddies and poleward  
474 flows: an overview. *Deep Sea Research Part I: Oceanographic Research*  
475 *Papers* 52, 621-646, doi:10.1016/j.dsr.2004.11.005

476 Poirier, R.K., Billups, K., 2014: The intensification of northern component deepwater  
477 formation during the mid-Pleistocene climate transition. *Paleoceanography* 29,  
478 1046-1061, doi:10.1002/2014PA002661

479 Railsback, L.B., Gibbard, P.L., Head, M.J., Voarintsoa, N.R.G., Toucanne, S., 2015:  
480 An optimized scheme of lettered marine isotope substages for the last 1.0  
481 million years, and the climatostratigraphic nature of isotope stages and  
482 substages. *Quat. Sci. Rev.* 111, 94–106

483 Rios, A.F., Perez, F.F., Fraga, F., 1992: Water Masses in the Upper and Middle  
484 North-Atlantic Ocean East of the Azores. *Deep-Sea Res. Pt. A*, 39, 645-658

485 Rodrigues, T., Alonso-García, M., Hodell, D.A., Rufino, M., Naughton, F., Grimalt,  
486 J.O., Voelker, A.H.L., Abrantes, F., 2017: A 1-Ma record of sea surface



487 temperature and extreme cooling events in the North Atlantic: A perspective  
488 from the Iberian Margin. *Quat. Sci. Rev.* 172, 118-130

489 Rodríguez-Tovar, F.J., Dorador, J., Martín-García, G.M., Sierro, F.J., Flores, J.A.,  
490 Hodell, D.A., 2015: Response of macrobenthic and foraminifer communities to  
491 changes in deep-sea environmental conditions from Marine Isotope Stage  
492 (MIS) 12 to 11 at the “Shackleton Site”. *Global and Planetary Change* 133, 176-  
493 187

494 Ruddiman, W.F., Raymo, M.E., Martinson, D.G., Clement, B.M., Backman, J., 1989:  
495 Sea surface temperature reconstruction of DSDP Site 94-607 in the North  
496 Atlantic. doi:10.1594/PANGAEA.52373

497 Sabine, C. L., Feely, R. A., Gruber, N., Key, R. M., Lee, K., Bullister, J. L.,  
498 Wanninkhof, R., Wong, C. S., Wallace, D. W. R., Tilbrook, B., Millero, F. J.,  
499 Peng, T. H., Kozyr, A., Ono, T. and Rios, A. F. 2004: The oceanic sink for  
500 anthropogenic CO<sub>2</sub>. *Sci.*, 305, 367-371

501 Salgueiro, E., Voelker, A.H.L., de Abreu, L., Abrantes, F., Meggers, H., Wefer, G.,  
502 2010: Temperature and productivity changes off the western Iberian margin  
503 during the last 150 ky. *Quaternary Science Reviews* 29, 680-695,  
504 doi:10.1016/j.quascirev.2009.11.013

505 Stein, R., Hefter, J., Grütznér, J., Voelker, A., Naafs, B.D.A., 2009: Variability of  
506 surface water characteristics and Heinrich-like events in the Pleistocene  
507 midlatitude North Atlantic Ocean: Biomarker and XRD records from IODP Site  
508 U1313 (MIS 16-9). *Paleoceanography* 24, doi:10.1029/2008PA001639

509 Stow, D.A.V., Hernández-Molina, F.J., Alvarez-Zarikian, C.A., and Expedition 339  
510 Scientists, 2012: Mediterranean outflow: environmental significance of the  
511 Mediterranean Outflow Water and its global implications. IODP Preliminary  
512 Report, 339, doi:10.2204/iodp.pr.339.2012

513 Vautravers, M.J., Shackleton, N.J., Lopez-Martinez, C., Grimalt, J.O., 2004: Gulf  
514 Stream variability during marine isotope stage 3. *Paleoceanography* 19, PA2011,  
515 doi:10.1029/2003PA000966

516 Villanueva, J., Calvo, E., Pelejero, C., Grimalt, J.O., Boelaert, A., Labeyrie, L., 2001:  
517 A latitudinal productivity band in the Central North Atlantic over the last 270 kyr:

518 an alkenone perspective. *Paleoceanography* 16, 617-626,  
 519 doi:610.1029/2000PA000543

520 Voelker, A.H.L., Rodrigues, T., Billups, K., Oppo, D., McManus, J., Stein, R., Hefter,  
 521 J., Grimalt, J.O., 2010: Variations in mid-latitude North Atlantic surface water  
 522 properties during the mid-Brunhes (MIS 9-14) and their implications for the  
 523 thermohaline circulation. *Clim. Past* 6, 531-552, doi:10.5194/cp-6-531-2010

524 Wright, A.K., Flower, B.P., 2002: Surface and deep ocean circulation in the subpolar  
 525 North Atlantic during the mid-Pleistocene revolution. *Paleoceanography* 17,  
 526 1068, doi:10.1029/2002PA000782

527 Zahn, R., Schönfeld, J., Kudrass, H.R., Park, M.H, Erlenkeuser, H. Grootes, P., 1997:  
 528 Thermohaline instability in the North Atlantic during meltwater events: Stable  
 529 isotope and ice-rafted detritus records from core SO75-26KL, Portuguese  
 530 margin. *Paleoceanography* 12, 696-710

531

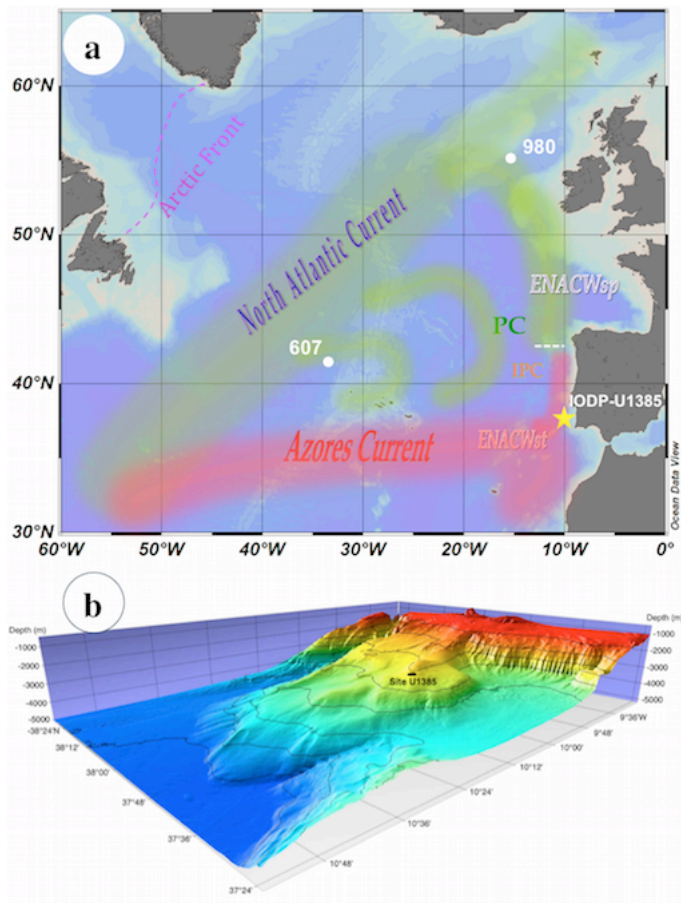

532  
 533

534 **Figure 1.** (a) Modern surface circulation in the North Atlantic and location of IODP-  
535 U1385 and other sites discussed in this paper. *ENACWsp* Eastern North Atlantic  
536 Central Waters of subpolar origin; *ENACWst*, Eastern North Atlantic Central Waters  
537 of subtropical origin; *IPC*, Iberian Poleward Current; *PC*, Portugal Current. The white  
538 dashed line represents the today's approximate surface limit between *ENACWsp* and  
539 *ENACWst* (Fiúza et al., 1998). (b) Regional bathymetry of the SW Iberian margin,  
540 showing site U1385 (Expedition 339 Scientists, 2012).

541

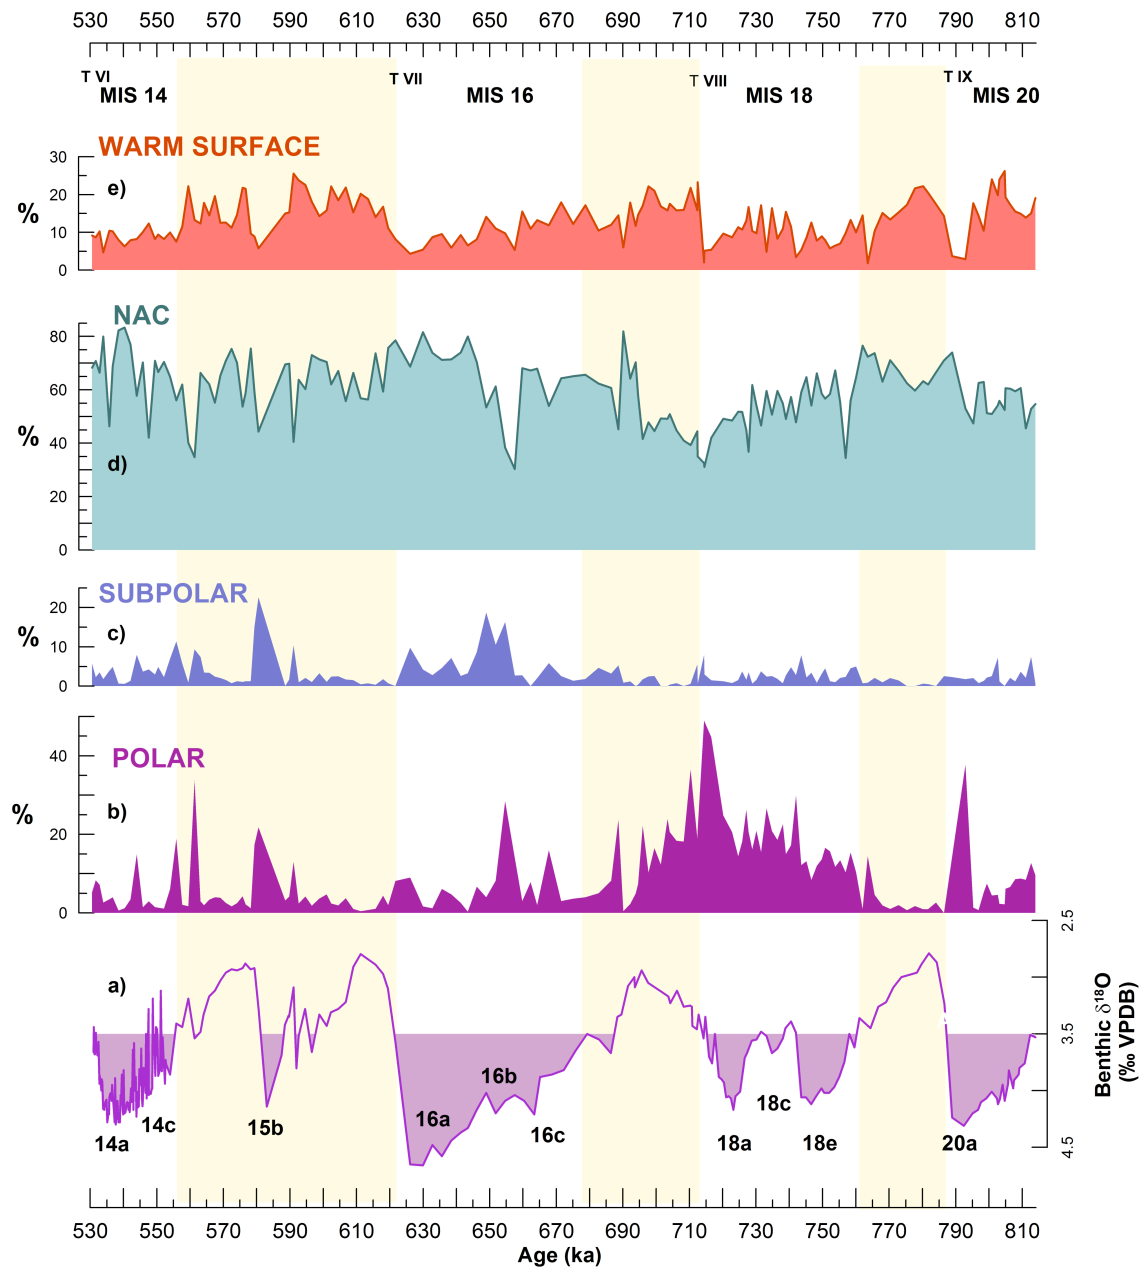

542

543 **Figure 2.** Relative abundance of planktonic foraminiferal species and assemblages in  
 544 IODP-U1385 through MIS 14-20, and comparison with benthic isotope data from the  
 545 same site. (a) Benthic  $\delta^{18}\text{O}$  record (Hodell et al., 2015) with filling enhancing glacial  
 546 conditions according to the threshold for the North Atlantic (McManus et al., 1999);  
 547 glacial substages are named according to Railsback et al. (2015). Relative

548 abundance of: (b) polar species *N. pachyderma* sinistral; (c) subpolar species *T.*  
549 *quinqueloba*; (d) NAC assemblage (as defined by Ottens, 1991); and (e) warm  
550 surface assemblage (as defined by Vautravers et al., 2004). Yellow bands highlight  
551 interglacials. Terminations (T) are marked in roman numerals. IODP-U1385 isotopic  
552 record is from Hodell et al. (2015).  
553

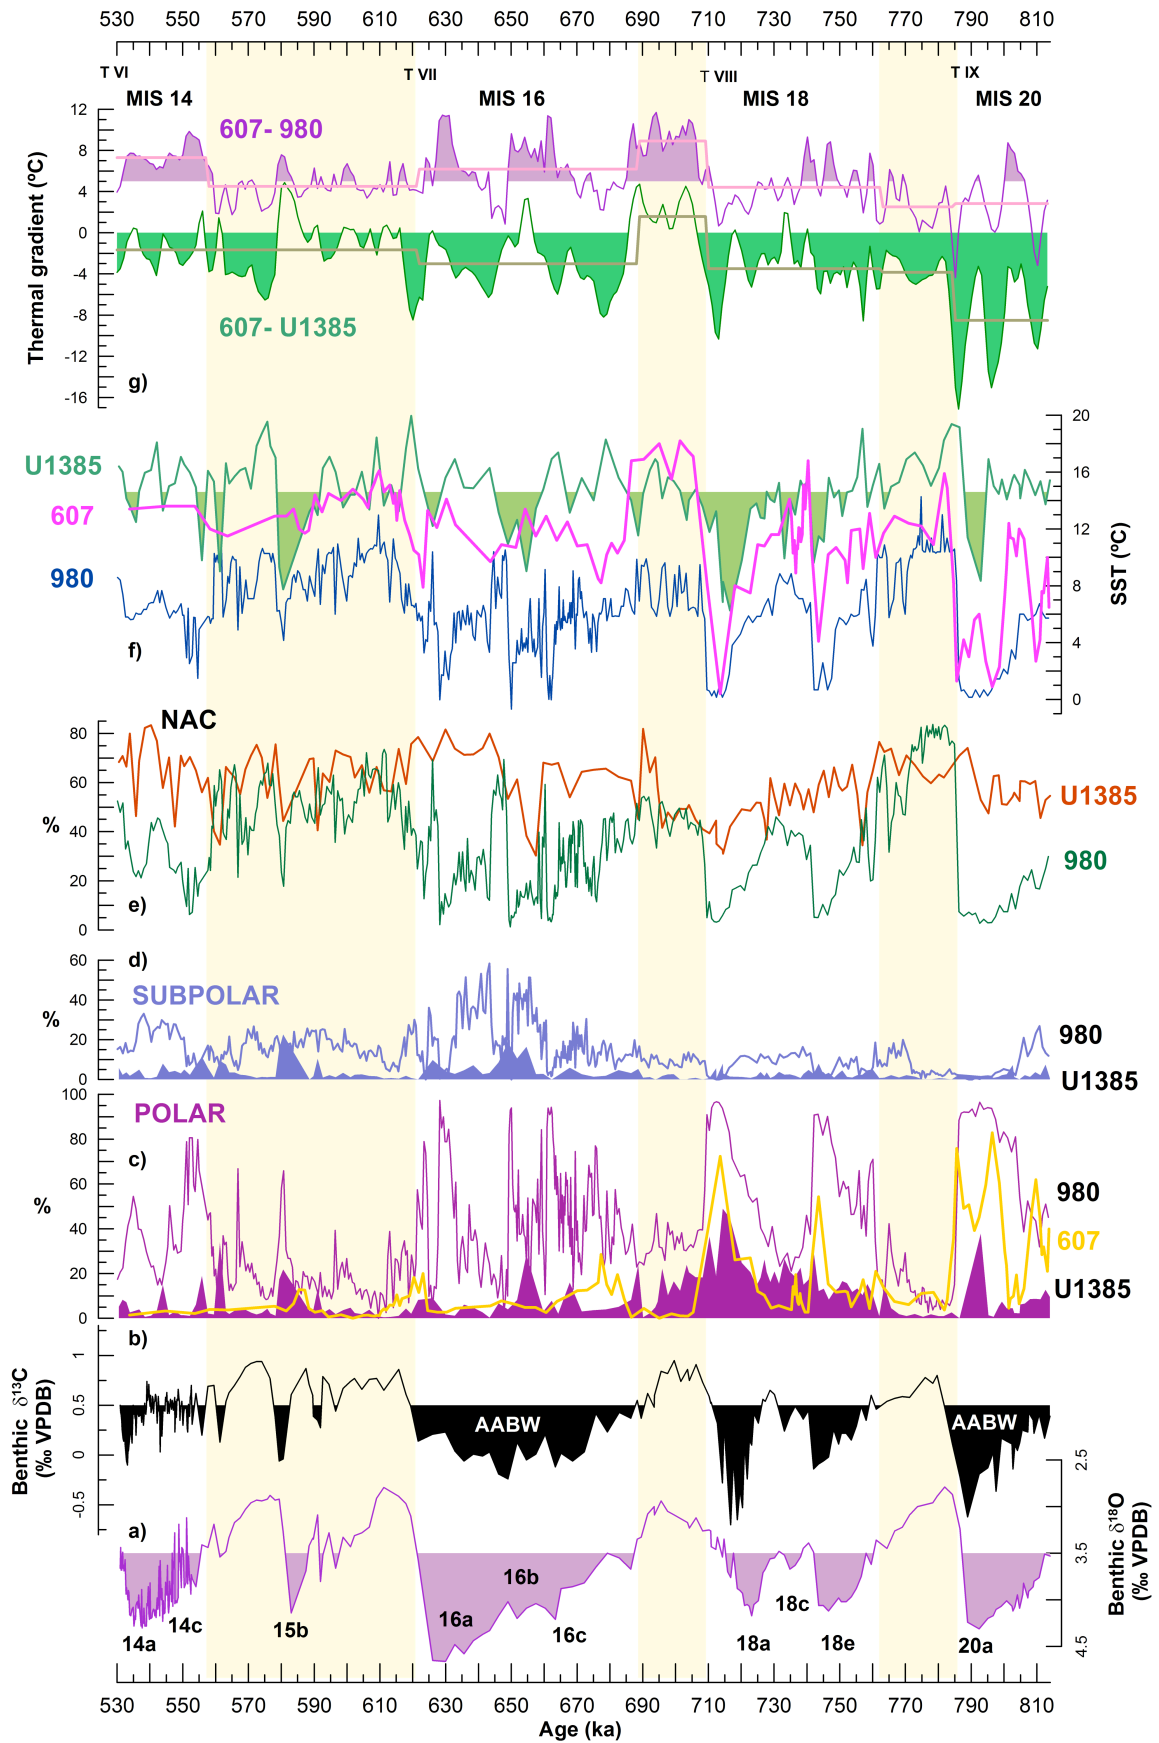

555

556 **Figure 3.** Comparison of records from the mid-latitude (IODP-U1385; ODP-607) and  
557 the subpolar (ODP-980) North Atlantic. Benthic  $\delta^{18}\text{O}$  (a), and  $\delta^{13}\text{C}$  (b) from U1385  
558 (Hodell et al., 2015); filling in (b) enhancing  $^{13}\text{C}$ -depleted values typical for Antarctic  
559 bottom water (AABW) (Adkins et al., 2005). (c) Percentage of *N. pachyderma* sinistral  
560 in sites U1385 (filled), 607 (glod) and 980 (purple). (d) Relative abundance of *T.*  
561 *quinqueloba* for sites U1385 (filled) and 980. (e) Relative abundance of the NAC  
562 assemblage (as defined by Ottens, 1991) in sites U1385 (red) and 980 (green). Site  
563 980 faunal data are from Wright and Flower, 2002; for this work, the NAC  
564 assemblage of site 980 has been calculated using the published census counts. (f)  
565 SST from sites 980 (dark blue; Wright and Flower, 2002), 607 (pink; Ruddiman et al.,  
566 1989), and U1385 (green; Martin-Garcia et al., 2015), with filling enhancing lower  
567 than 14.6 °C, the average SST for the study interval. (g) Longitudinal (green) and  
568 latitudinal (purple) thermal gradients, with the statistical mean for each MIS  
569 represented in superimposed straight lines. Age models for sites 980 and 607 have  
570 been re-calculated using the LR04-stock. Yellow bands highlight interglacials.  
571 Terminations (T) are marked in roman numerals.
